# Supplementary material for: Study on the design, synthesis and activity of MDM2/MDMX anti-tumor stapled peptide PROTAC
Source: Research Square preprint supplement (doi:10.21203/rs.3.rs-6970001/v1), 2025-08-11
Supplement: Supplementary file 1 [file DSM-CCK8.xlsx]

## Sheet: Sheet1
U251	0	2	4	8	16	32	0	2	4	8	16	32
DSM3-1	0.454	0.77	0.8145	0.8815	0.8485	1.021	0.7675	0.775	0.8125	0.865	0.56	0.189	DSM3-2
(四个复孔）	0.4215	0.742	0.772	0.808	0.7525	0.736	0.5695	0.787	0.6455	0.7615	0.481	0.175
	0.655	0.654	0.9315	0.54	0.781	0.7785	0.598	0.665	0.572	0.7505	0.3325	0.166
	0.6995	0.638	0.8175	0.7855	0.8125	0.903	0.8935	0.6615	0.8155	0.7285	0.3785	0.1685
DSM3-4	0.912	0.7685	0.908	0.6475	0.7695	0.7175	0.75	0.8855	0.9235	0.8165	0.215	0.1425	DSM3-5
	0.812	0.6215	0.855	0.8515	0.7095	0.643	0.7955	0.676	0.7095	0.7035	0.242	0.158
	0.7235	0.7665	0.797	0.7705	0.6945	0.6895	0.734	0.693	0.7175	0.7015	0.258	0.1535
	1.0405	0.491	0.8425	0.6855	0.687	0.949	0.786	0.856	0.8125	0.709	0.2865	0.1635
U87	0	2	4	8	16	32	0	2	4	8	16	32
DSM3-1	1.319	1.2655	1.265	1.1565	1.126	0.9815	1.0845	1.2505	0.9985	1.1155	0.7985	0.2865	DSM3-1
	1.253	1.23	1.269	1.285	0.0685	1.211	1.142	1.291	0.944	1.0525	0.6865	0.221
	1.198	1.167	1.5245	1.3025	1.3765	1.405	1.3475	1.344	1.1665	1.0725	0.574	0.198
	1.203	1.3275	1.486	1.829	1.2765	1.5145	1.5885	1.515	1.144	1.23	0.45	0.19
DSM3-4	1.176	1.1725	1.2635	1.2905	1.3245	1.291	1.1195	1.3175	1.378	1.1655	0.6255	0.173	DSM3-5
	1.1845	1.1975	1.5005	1.451	1.234	1.2405	1.4165	1.433	1.292	1.2205	0.524	0.171
	1.19	1.2955	1.585	1.3435	1.2	1.2175	1.187	1.4915	1.153	1.141	0.482	0.182
	1.2025	1.109	1.085	1.058	0.9375	1.0145	1.003	1.325	1.2165	1.0705	0.653	0.185
