# Supplementary material for: Study on the design, synthesis and activity of MDM2/MDMX anti-tumor stapled peptide PROTAC
Source: Research Square preprint supplement (doi:10.21203/rs.3.rs-6970001/v1), 2025-08-11
Supplement: Supplementary file 13 [file DSM3-2.docx]

DSM3-2(5-80)
